1 **Horizontal transfer and gene loss shaped the evolution of alpha-amylases in**  
2 **bilaterians**

3

4

5

6 Andrea Desiderato (1, 2), Marcos Barbeitos (1), Clément Gilbert (3), Jean-Luc Da Lage (3)

7

8 (1) Graduate Program in Zoology, Zoology Department, Federal University of Paraná, CP  
9 19020, Curitiba, Paraná 81531-980, Brazil

10 (2) Department of Functional Ecology, Alfred Wegener Institute & Helmholtz Centre for  
11 Polar and Marine Research, Am Handelshafen 12, 27570 Bremerhaven, Germany

12

13 (3) Évolution, Génomes, Comportement, Écologie. CNRS, IRD, Université Paris-Sud.  
14 Université Paris-Saclay. F-91198 Gif-sur-Yvette, France

15

16

17

18

19

20 **Abstract**

21 The subfamily GH13\_1 of alpha-amylases is typical of Fungi, but it also includes some  
22 unicellular eukaryotes (e.g. Amoebozoa, choanoflagellates) and non-bilaterian Metazoa.  
23 Conversely, since a previous study in 2007, all Bilateria were considered to harbor only alpha-  
24 amylases supposedly inherited by horizontal transfer from a proteobacterium and classified in  
25 the subfamilies GH13\_15 and 24, which were therefore commonly called bilaterian alpha-  
26 amylases. The taxonomic scope of Eukaryota genomes in databases has been greatly increased  
27 ever since 2007. We have surveyed GH13\_1 sequences in recent data from non-bilaterian  
28 animals and unicellular eukaryotes. We found a number of those sequences in Anthozoa

29 (Cnidaria) and in sponges, confirming the previous observations, but none in Ctenophora. Most  
30 surprisingly, such fungal (also called Dictyo-type) amylases were also consistently retrieved in  
31 a limited number of bilaterian phyla: hemichordates (deuterostomes), brachiopods, some  
32 molluscs and annelids (protostomes). We discuss evolutionary hypotheses for these findings,  
33 namely, the retention of the ancestral gene in those phyla only and/or horizontal transfers from  
34 non-bilaterian donors.

35

36 **Key words:** alpha-amylase, gene loss, horizontal gene transfer, hemichordates, brachiopods,  
37 phoronids, molluscs, annelids, Bilateria, glycosyl hydrolase, introns

38

## 39 Introduction

40 Alpha-amylases are enzymes that are almost ubiquitous in the living world, where they  
41 perform the hydrolysis of starch and related polysaccharides into smaller molecules, to supply  
42 energy to the organism through digestion. They belong to glycosyl hydrolases, a very large  
43 group of enzymes which have been classified in a number of families according to their  
44 structures, sequences, catalytic activities and catalytic mechanisms (HENRISSAT AND DAVIES  
45 1997). Most alpha-amylases are members of the glycoside hydrolase family 13 (GH13), which  
46 includes enzymes that can either break down or synthesize  $\alpha$ -1,4-,  $\alpha$ -1,6- and, less commonly,  $\alpha$ -  
47 -1,2- and  $\alpha$ -1,3-glycosidic linkages. Sucrose and trehalose are also substrates for enzymes of this  
48 family (MACGREGOR *et al.* 2001). The numerous family GH13 is divided into 42 subfamilies, of  
49 which only three occur in Metazoans: GH13\_1, GH13\_15 and GH13\_24 (STAM *et al.* 2006; DA  
50 LAGE *et al.* 2007); Lombard, 2014 #2103}. The latter two include the common animal alpha-  
51 amylases, while the former was first described in Fungi for which it represents the canonical  
52 alpha-amylase (STAM *et al.* 2006). In 2007, Da Lage *et al.* (DA LAGE *et al.* 2007) described the  
53 subfamilies GH13\_15/24 as private to Bilateria among metazoans. In the same article, they  
54 retrieved sequences belonging to the subfamily GH13\_1 from the sponge *Amphimedon*  
55 *queenslandica* (named *Reniera sp.* in their paper) and the sea anemone *Nematostella vectensis*,  
56 besides the unikont choanoflagellates and amoebozoans, and also excavates and ciliates. They  
57 dubbed “Dictyo-type” this alpha-amylase, referring to the slime mold *Dictyostelium discoideum*  
58 (Amoebozoa Mycetozoa). The authors proposed that this amylase, ancestral to the Unikont  
59 clade, is shared among non-bilaterian metazoans (e.g. sponges, sea anemones and corals, and  
60 Placozoa), but is not found in the Bilateria, being replaced in this clade by an alpha-amylase of  
61 bacterial origin, whose sequence is close to the typical animal amylases.

62 Given that a number of new genomes have been sequenced in the twelve years after that  
63 publication, we explore again the diversification of this enzyme subfamily among the Eukaryota.  
64 We will focus mainly on Metazoa, in which we show unexpected situations of co-occurrence of  
65 both subfamilies GH13\_1 and GH13\_15 in the same genomes. We will discuss two mutually  
66 exclusive explanations that may be proposed: either the retention of the ancestral GH13\_1 gene  
67 along with the typical bilaterian GH13\_15 in multiple phyla, or horizontal transfer(s) from non-  
68 bilaterian donor(s) which would have to be identified.

69

70

## 71 **Materials and methods**

72 In order to further characterize the distribution of GH13\_1 genes in Metazoa, we used  
73 the sequence of the sponge *Amphimedon queenslandica* GH13\_1 (GenBank XP\_019851448) as  
74 a query to perform BLASTP and TBLASTN searches on various online databases available in  
75 Genbank (nr, proteins, genomes, assembly, SRA, TSA, WGS), compagen.org,  
76 marinegenomics.oist.jp, reefgenomics.org, marimba.obs-vlfr.fr, vectorbase.org, AmpuBase  
77 (<https://www.comp.hkbu.edu.hk/~db/AmpuBase/index.php>) (IP *et al.* 2018), between October  
78 2018 and April 2019. Fungi were not searched further in this study because they are known to  
79 have a GH13\_1 member as the usual alpha-amylase. To increase the chances to retrieve potential  
80 cnidarian or ctenophoran sequences, the starlet sea anemone *Nematostella vectensis* amylase  
81 (XP\_001629956) was also used to query those databases. After the discovery of GH13\_1-like  
82 sequences in Bilateria, the sequence XP\_013396432 of the brachiopod *Lingula anatina* was also  
83 used specifically for additional search in Bilateria. Non-animal eukaryote species were  
84 investigated using the *Dictyostelium discoideum* sequence XP\_640516 as query. The BLAST  
85 hits were considered further when expectation values (e-values) were better (lower) than  $10^{-100}$   
86 for BLASTP or  $10^{-75}$  for TBLASTN, except for constitutively small hits such as SRA (sequence  
87 read archives). These were only considered when several highly significant hits covered most of  
88 the query sequence. When SRA hits had too many gaps, we did not attempt to assemble longer  
89 sequences and thus we did not use such sequences in alignments or phylogenies. Finally, we kept  
90 only sequences which were inside long contigs, or full-size or near full-size transcripts. We also  
91 checked once again the absence of animal-type alpha-amylase (GH13\_15 or 24) outside the  
92 Bilateria using the sequence of the bivalve *Corbicula fluminea* (AAO17927) as a BLASTP  
93 query. The CAZy database (cazy.org (LOMBARD *et al.* 2014)), which is devoted to glycosyl  
94 hydrolases and related enzymes was used to check assignment of some of the sequences found to  
95 the GH13\_1 subfamily.

96 Intron-exon gene structures were recovered either from alignments between genomic  
97 sequences and their mRNA counterparts, or using annotated graphic views when available in the  
98 databases. In some cases, for unannotated genes, the N-terminal and/or the C-terminal parts of  
99 the retrieved genomic sequences were uncertain, and were not retained in the analyses.

100 Alignments were performed using MUSCLE (EDGAR 2004), as implemented in  
101 Geneious (Biomatters Ltd.). A maximum likelihood (ML) tree was built using PhyML's  
102 (GUINDON AND GASCUEL 2003) current implementation at the phylogeny.fr portal (DEREEPER *et*  
103 *al.* 2008). To this end, we first trimmed the N-terminal protein sequences up to the first well

104 conserved LLTDR motif. C-terminal parts were also truncated at the last well aligned  
105 stretch. Gaps were removed from the alignments and data were analyzed under WAG (WHELAN  
106 AND GOLDMAN 2001) with among-site rate variation modeled by four discretized rate categories  
107 sampled from a gamma distribution. Both the alpha parameter and the proportion of invariable  
108 sites were estimated from the data. The robustness of the nodes was estimated using an  
109 approximate likelihood ratio test (aLRT) (ANISIMOVA AND GASCUEL 2006). The tree was drawn  
110 at the iTOL website (LETUNIC AND BORK 2016). Metazoans and choanoflagellates were clustered  
111 as the ingroup.

112

113

## 114 **Results**

115 The new sequences retrieved from the databases are listed in Table 1. A general protein  
116 alignment of the sequences found in this study along with already known GH13\_1 sequences is  
117 shown in Fig. S1.

118

### 119 *GH13\_1 sequences retrieved from unicellular taxa*

120 We confirmed the presence of GH13\_1 in dictyostelids, in ciliates and also in  
121 oomycetes, some representatives of which (but not all) are indicated in Table 1. In two  
122 oomycetes, *Saprolegnia diclina* and *Achlya hypogyna*, the GH13\_1-like sequences were the C-  
123 terminal half of longer sequences, the N-terminal half of which was similar to unclassified GH13  
124 sequences found in e.g. *Acanthamoeba histolytica* (GenBank accession BAN39582), according  
125 to the CAZy database. In our general phylogenetic tree (Fig. 1), these sequences were used as  
126 outgroups. In choanoflagellates, where *Monosiga brevicollis* was already known to harbor a  
127 GH13\_1 sequence (DA LAGE *et al.* 2007), we found a GH13\_1 sequence in the genome of  
128 *Salpingoeca rosetta*. A partial sequence was also returned from incomplete genome data from  
129 *Monosiga ovata* (at Compagen, not shown).

130

### 131 *GH13\_1 sequences retrieved from non-bilaterian animals*

132 In Cnidaria, a number of GH13\_1 sequences were recovered from many Anthozoa  
133 species, (sea anemones, corals and allies), from genome as well as transcriptome data, at the

134 Reefgenomics database. Interestingly, we found no alpha-amylase sequences at all in Medusozoa  
135 (jellyfish, hydras) nor in Endocnidozoa (parasitic cnidarians). In the general tree (Fig. 1),  
136 cnidarian sequences form a clear cluster, with two main branches, grouping Actiniaria (sea  
137 anemones) and Pennatulacea (soft corals) on one branch, and Scleratinia (hard corals) and  
138 Corallimorpharia (mushroom anemones) on the other branch.

139 In sponges (Porifera), data were less abundant. No alpha-amylase sequence was found  
140 in *Sycon ciliatum* (Calcarea) and *Oscarella carmela* (Homoscleromorpha). All the sequences we  
141 retrieved belonged to Demospongiae. Similarly, we found no amylase sequence at all in the  
142 phylum Ctenophora (*Mnemiopsis leidyi*, *Pleurobrachia pileus*), the phylogenetic position of  
143 which is controversial: it has been recovered as the most basal metazoan (WHELAN *et al.* 2017),  
144 as Cnidaria's sister group e.g. (PHILIPPE *et al.* 2009; SIMION *et al.* 2017), re-establishing  
145 Coelenterata, and also as the earliest branch in the Eumetazoa (animals with a digestive cavity  
146 and/or extra cellular digestion) e.g. (PISANI *et al.* 2015).

147

#### 148 *GH13\_1 sequences retrieved from bilaterian animals*

149 The surprising finding of this study, on which we will focus our attention, is the  
150 consistent, albeit sparse, occurrence of GH13\_1 alpha-amylase sequences in several bilaterian  
151 phyla: hemichordates, which are deuterostomes, brachiopods and phoronids (Brachiozoa) and  
152 some molluscs and annelids (Eutrochozoa), which are all protostomes. In the brachiopod *Lingula*  
153 *anatina*, two paralogs were found, as in the phoronid *Phoronis australis* (Table 1). In both  
154 species, the two copies are located on different contigs. The paralog sequences are rather  
155 divergent, given their positions in the tree (Fig 1) and each paralog groups the two species  
156 together. This indicates that not only duplication, but also the divergence between paralogs is  
157 ancestral to these species, dating back at least to basal Cambrian, according to the TimeTree  
158 database (KUMAR *et al.* 2017). GH13\_1 sequences were found in other brachiopods as sequence  
159 reads (SRA) from transcriptome data only, with no available genomic support (listed in Table 1).  
160 We must be cautious with transcriptome data alone, since BLAST hits pertaining to transcripts  
161 from contaminating symbionts or parasites may be found (BORNER AND BURMESTER 2017).  
162 However, six different brachiopod species returned positive hits, giving some robustness to our  
163 finding. Importantly, the related phyla Bryozoa and Nemertea (KOCOT 2015; LUO *et al.* 2018),  
164 but see (MARLÉTAZ *et al.* 2019) returned no GH13\_1 hits, but these animals are still poorly

165 represented in sequence databases (only one whole genome in Genbank for Nemertea as of April  
166 2019).

167         Similarly, we found three gene copies in the genomes of the hemichordates *Sacoglossus*  
168 *kowalevskii* and *Ptychodera flava*. In both species, two copies are close to each other  
169 (XP\_006816581 and XP\_006816582 in *S. kowalevskii*, and their counterparts in *P. flava*) as  
170 shown by the topology of the gene tree (Fig. 1). This could suggest independent gene duplication  
171 in each species. However, we observed that the two duplicates were arranged in tandem in both  
172 species, which would rather suggest concerted evolution of two shared copies. In *P. flava*, this  
173 genome region is erroneously annotated as a single gene at the OIST Marine Genomics database.  
174 The three copies were therefore probably already present before the split of the two lineages,  
175 some 435 mya (KUMAR *et al.* 2017). The third paralog is very divergent from the two other  
176 copies, so its divergence from the ancestral copy probably occurred before the species split, as  
177 well. Another hemichordate species, *Schizocardium californicum*, harbors a GH13\_1 gene, as  
178 shown by SRA search in GenBank (Table 1). A positive result was also retrieved from the  
179 genome of *Glandiceps talaboti* (Héctor Escrivà, Oceanology Observatory at Banyuls-sur-mer,  
180 personal communication). All the species mentioned above belong to the subphylum  
181 Enteropneusta. No data from other hemichordate subphyla were available to us.

182         In molluscs, we found BLAST hits with significant e-values in a few gastropod species  
183 from two clades only, the Vetigastropoda (e.g. the abalone *Haliotis* sp.) and the Caenogastropoda  
184 (e.g. Ampullariidae such as *Pomacea canaliculata*). We consistently found one copy in eight  
185 species belonging to the family Ampullariidae. In *P. canaliculata*, the genome of which has been  
186 annotated, the GH13\_1 sequence (XP\_025109323) lies well inside a 26 Mb long scaffold  
187 (linkage group 10, NC\_037599) and is surrounded by *bona fide* molluscan genes (Table S1). A  
188 GH13\_1 sequence was found in the gastropod *Colubraria reticulata*, but in a very short,  
189 intronless contig (GenBank accession number CVMW01047267), that was barely longer than  
190 the gene itself. Therefore, we disregarded this hit. We also found GH13\_1 sequences in a few  
191 bivalves, belonging to Mytiloidea (e.g. the mussel *Mytilus galloprovincialis*), Pterioidea (e.g. the  
192 pearl oyster *Pinctada imbricata*) and Arcoidea (e.g. *Scapharca broughtoni*). Reciprocal BLAST  
193 in GenBank nr using these molluscan high-scoring segment pairs (HSPs) always returned  
194 *Lingula anatina* as the best hit. Although several genomes or transcriptomes have been  
195 sequenced from other bivalve and gastropod clades, we retrieved no GH13\_1-like sequences  
196 from the databases except in the aforementioned clades. We found no such sequence in  
197 cephalopods either. In some cases, the sequences were retrieved from the TSA database (see

198 Table 1), whose issues were mentioned above. As an example, we found a significant hit in a  
199 transcriptome database of the sea hare *Aplysia californica* (TSA GBDA01069500) but this  
200 sequence was not found in the *A. californica* genome, which is well annotated; it was indeed  
201 related to ciliates.

202 In annelids, we found occurrences of GH13\_1 genes in a few species, the genomes of which are  
203 still not fully assembled, namely the “polychaetes” *Hydroides elegans* and *Pygospio elegans* but  
204 not in the well annotated genome of *Capitella teleta*. We also recovered HSPs from the clitellate  
205 *Glossoscolex paulistus* but not from *Amyntas corticis* or *Eisenia fetida*. Therefore, in molluscs  
206 as well as in annelids, the presence of GH13\_1 genes is scattered across lineages. We found that  
207 the mollusc GH13\_1-like sequences were much shorter, either truncated at the C-terminal, or this  
208 region was so divergent from the query sequence (*L. anatina*) that it was impossible to identify,  
209 assemble and align it with our data set (Fig. S1). In addition, we found that the annelid  
210 *Hydroides elegans* had an internal deletion, which precluded its inclusion in the phylogenetic  
211 analysis. This suggests that those sequences may not have alpha-amylase activity.

212

### 213 *Gene tree analysis: position of bilaterian sequences*

214 The goal of the gene tree analysis is to examine whether the occurrence of GH13\_1  
215 genes in bilaterian animals may be due to horizontal transfer (HGT) or if they descend from a  
216 GH13\_1 alpha-amylase copy ancestral to Unikonts. In the first case, the bilaterians GH13\_1  
217 sequences are unlikely to cluster together and the gene tree topology will likely display one or  
218 more nodes that are inconsistent with the bilaterian phylogeny. In the second case, the bilaterian  
219 sequences are expected to recover a bilaterian clade and to have a cnidarian clade as its sister  
220 group (LAUMER *et al.* 2018). The actual tree topology (Fig. 1) is not that straightforward when it  
221 comes to the bilaterian relationships, although we may rule out any proximity of bilaterians  
222 GH13\_1 sequences with unicellular or fungal sequences, regardless of tree rooting.

223 All Cnidarian orthologs form a well-supported cluster. The sistership between  
224 Corallimorpharia and Scleractinia reflects what was recovered in species trees using different  
225 markers (e.g. (RODRIGUEZ *et al.* 2014)), although the Scleractinia topology disagrees with  
226 previous phylogenetic analyses of the order (e.g. (BARBEITOS *et al.* 2010)). The other cluster  
227 within Cnidaria is mainly composed of actiniarian (sea anemone) sequences, but it also includes  
228 the sequence of *Renilla reniformis*, which belongs to Octocorallia, a clade that is sister to  
229 Scleractinia + Corallimorpharia (RODRIGUEZ *et al.* 2014). This strong inconsistency between the



230 *R. reniformis* position in the GH13\_1 topology and the species tree topology may be interpreted  
231 as due to a horizontal transfer event that would have occurred within Cnidaria. Most bilaterian  
232 sequences are clustered with Cnidaria, as phylogenetically expected in the case of a shared  
233 ancestral gene, as a robust cluster grouping one Brachiozoa (brachiopod/phoronid) copy, the  
234 molluscs and the annelids, which is consistent with the phylogeny. However, the tandem  
235 hemichordate duplicates and the other Brachiozoa genes are not included in the bilaterian clade,  
236 but remain ingroup relative to the sponge sequences.

237 Interestingly, the two remaining hemichordate sequences are the earliest diverging lineage of the  
238 Metazoa + Choanoflagellata cluster, since they are branched with the placozoan *Trichoplax*  
239 *adhaerens* sequence, this relationship being strongly supported whatever the tree reconstruction  
240 method employed (not shown - Fig. 1). In order to check for the possibility of a long branch  
241 attraction (LBA), which would artificially cluster hemichordate and placozoan sequences, we  
242 performed Tajima's relative rate tests (TAJIMA 1993) using MEGA7 (KUMAR *et al.* 2016). The  
243 sequence of *S. kowalevskii* XP\_006819810, suspected to evolve fast, was compared with its  
244 paralog XP\_006816581, using five different outgroups, i.e. the three sponges and the two  
245 choanoflagellates. Unexpectedly, the  $\chi^2$  tests returned non-significant values in two tests and  
246 significant values in three tests (Table S2). Therefore, with our data, LBA cannot be entirely  
247 ruled out in this particular case.

248

#### 249 *Analysis of intron positions*

250 Intron positions may be valuable markers when reconstituting gene histories. We  
251 identified 56 intron positions from the subset of species of the general tree for which we could  
252 find data (Fig. 2). Only one intron position is widely shared among these GH13\_1 gene  
253 sequences. It is the first position reported in the alignment, and it lies just upstream to the first  
254 conserved part of the alignment. The main observation is the numerous conserved positions  
255 across bilaterian sequences (10 positions), and between bilaterian sequences and the sponge and  
256 the Placozoa (7 positions). In addition, three positions are common to bilaterians and the  
257 choanoflagellate *Monosiga brevicollis*. In contrast, the Cnidaria have few introns, with positions  
258 different from the sponge and the bilaterians, except for position 1. The other species under  
259 examination, i.e. protists and fungi, have essentially specific intron positions. This is a further  
260 argument to state that the occurrence of GH13\_1 alpha-amylases in some bilaterians is a story  
261 that is internal to metazoans.

262

263

## 264 **Discussion**

265           We have shown here that a limited number of bilaterian animals, all being aquatic  
266 species, namely hemichordates, brachiopods and phoronids, and some sparse molluscs and  
267 annelids, do have GH13\_1 alpha-amylase genes. Note that all those species do have at least one  
268 “classical” animal alpha-amylase of the GH13\_15/24 subfamilies. We are quite confident that  
269 the GH13\_1 sequences we found are not due to contaminating DNA. First, two species with  
270 whole genome sequenced and assembled were found to harbor such genes in each phylum  
271 Hemichordata and Brachiozoa, and the mollusc *Pomacea canaliculata* also has a well annotated  
272 genome. Additional sequences from other species belonging to these phyla were gathered from  
273 sketchy data, i.e. low-quality assembled genomes, transcriptomes or sequence read archive  
274 databases, which added some support to the presence of these amylase genes. Although  
275 transcriptome and rough genomic data should be handled with care, this lends support to our  
276 observations. Moreover, reciprocal BLAST from the transcriptome hits always returned a  
277 bilaterian (*L. anatina* or *S. kowalevskii*) best hit, not fungal, protist or other non-bilaterian  
278 GH13\_1 sequence. Second, the bilaterian sequences retrieved from assembled genomes were  
279 inside long contigs, and mostly surrounded by genes showing bilaterian best BLAST hits (Table  
280 S1). However, the *S. kowalevskii* XP\_006819810 gene could appear somewhat dubious, since it  
281 is placed at the distal end of a contig, with only two other genes on the contig (Table S1), one of  
282 which has a placozoan best hit. But its *P. flava* counterpart is well inside a very gene-rich contig.  
283 Therefore, these seemingly non-bilaterian genes are well in bilaterian genomic contexts.

284 The evolutionary scenario proposed by Da Lage et al (DA LAGE *et al.* 2007) suggested that the  
285 GH13\_1 alpha-amylase gene ancestral to Unikonts (Amoebozoa and Opisthokonts, i.e. Fungi  
286 and Metazoa/Choanoflagellata) was totally absent from Bilateria, due to complete replacement  
287 by a new alpha-amylase, originating from a bacterium through horizontal gene transfer (HGT).  
288 The new data unveils a more complicated story. There are two explanations which are mutually  
289 exclusive. The first explanation is that several HGTs occurred from non-bilaterian to  
290 hemichordate and Lophotrochozoa ancestors. The second explanation is that the ancestral gene  
291 was not lost in all bilaterian lineages, but remained (given the current data) in hemichordates,  
292 brachiopods and phoronids, and in scattered lineages across Mollusca and Annelida.

293           The hypothesis of HGT requires several such events between metazoans. It implies that  
294 HGTs obviously happened after the split of the two main branches of bilaterians, protostomes  
295 and deuterostomes, otherwise the transferred copies should have been lost in most phyla, like in  
296 the alternative hypothesis. More precisely, in the case of Lophotrochozoa, this would have  
297 occurred before the diversification of this clade and after its divergence from the Platyzoa, some  
298 700 mya (KUMAR *et al.* 2017); in the case of hemichordates, after diverging from their common  
299 ancestor with the echinoderms, and before the divergence between *S. kowalevskii* and  
300 *Ptychodera flava*, i.e. between 657 and ca. 435 mya (KUMAR *et al.* 2017). Therefore, we may  
301 infer *at least* two HGTs, early in the evolution of each phylum, with subsequent losses in  
302 Lophotrochozoa (Fig. 3). The donor species, given the sequence clustering in the trees, could be  
303 related to cnidarians. However, we have underlined that the intron-exon structures of the  
304 bilaterian sequences were most similar to the one of the sponge, and that the cnidarian GH13\_1  
305 amylases had very different structures. This may be possible if the donors were related to  
306 cnidarians, perhaps an extinct phylum or an ancestor of extant Cnidaria, but had conserved the  
307 ancestral structures exemplified by the sponge and the placozoan. Indeed, if the structure shared  
308 by the sponge, the placozoan and the bilaterians reflects the ancestral state, cnidarians must have  
309 undergone a drastic rearrangement of the intron-exon structure of this gene. This would be in  
310 line with the long internal branch leading to this clade in the trees (Fig. 1), which suggests  
311 accelerated evolution.

312           The alternative hypothesis of massive GH13\_1 gene loss in most phyla except the ones  
313 where we found such sequences seems no more parsimonious. It requires many losses,  
314 depending on the phylogeny used (Fig. 3). For instance, regarding deuterostomes, one loss  
315 occurred in echinoderms and the other in the chordates. In protostomes, GH13\_1 loss in  
316 ecdysozoans, and independently in several lophotrochozoan lineages would be required to  
317 produce the observed pattern.

318           Although not parsimonious in terms of number of events, we would favor the gene loss  
319 hypothesis, because this is a common phenomenon, especially given how ubiquitous co-option is  
320 (HEJNOL AND MARTINDALE 2008; FLORES AND LIVINGSTONE 2017). In this respect, the  
321 GH13\_15/24 gene that was acquired from a bacterium is a type of horizontal transfer akin to  
322 what Husnik and McCutcheon called a “maintenance transfer” since it allowed the original  
323 function to be maintained while the primitive gene became free to evolve or even to be lost  
324 (HUSNIK AND MCCUTCHEON 2018) (see also (DA LAGE *et al.* 2013)). In contrast, while numerous  
325 cases of HGT from bacteria to metazoans have been reported (e.g., (DUNNING HOTOPP 2011;

326 HAEGEMAN *et al.* 2011; WYBOUV *et al.* 2016; CORDAUX AND GILBERT 2017)), very few HGT  
327 events have been inferred that involve a metazoan donor and a metazoan receiver (GRAHAM *et*  
328 *al.* 2012; GASMI *et al.* 2015). Thus, our current knowledge on HGT suggests that this type of  
329 transfer might be very rare between metazoans, and that two or more such events would be quite  
330 unlikely to explain the current taxonomic distribution of metazoan GH13\_1 genes. In addition, it  
331 has been shown that a seemingly patchy gene distribution suggestive of HGT may, after more  
332 comprehensive taxon sampling, turn out to be rather due to recurrent gene losses (HUSNIK AND  
333 MCCUTCHEON 2018). The conservation across phyla of the intron-exon structure, probably  
334 ancestral to the metazoans, would not be surprising (SULLIVAN *et al.* 2006 ; SRIVASTAVA *et al.*  
335 2008; SRIVASTAVA *et al.* 2010 ). For instance, 82% of human introns have orthologous introns in  
336 *T. adhaerens* (SRIVASTAVA *et al.* 2008).

337

338 In this work, the different sequences were assumed to be alpha-amylases according to  
339 BLAST e-values only. In addition, we also assumed that they all belong to the GH13\_1  
340 subfamily. Indeed, some of them have been assigned to this subfamily in the reference database  
341 CAZy.org (see Table 1), and if we add sequences from the closest subfamilies, namely GH13\_2  
342 or GH13\_19 (STAM *et al.* 2006) in the alignment and in the phylogenetic tree, the putative  
343 GH13\_1 and the ascertained GH13\_1 remain well clustered together (not shown). It is possible  
344 that modifications of a few amino acid positions could bring a change in the substrate or catalytic  
345 activity. For instance, concerning the substrate affinity, when the genome of *L. anatina* was  
346 released, the authors hypothesized a biomineralization pathway that involves acid proteins, as  
347 found in scleractinians and molluscs (MARIN *et al.* 2007; RAMOS-SILVA *et al.* 2013). Given the  
348 calcium binding activity of alpha-amylases (BOEL *et al.* 1990; GROSSMAN AND JAMES 1993;  
349 SVENSSON 1994; PUJADAS AND PALAU 2001), the presence of both GH13\_1 and GH13\_15  
350 subfamilies in *L. anatina* opens the possibility for the neofunctionalization of one of them in the  
351 biomineralization process. In the analyses performed by those authors, no amylase was found in  
352 the shell matrix, but this does not exclude the possibility of its presence in the pathway. The fact  
353 that in molluscs, the sequences are incomplete compared to the brachiopod query or to the  
354 sponge and cnidarian GH13\_1 amylases, and therefore probably devoid of an amylolytic  
355 function, would add credence to another function. This conjecture requires further investigation.  
356 On the other hand, the full-size GH13\_1 sequences only present in a few bilaterians could have  
357 remained true alpha-amylases with the classical function, but this would make even more  
358 enigmatic why they have been conserved, either by descent or by horizontal transfer.

359

360

361 **Acknowledgments:** We want to thank Pedro E. Vieira for introducing AD to molecular  
362 analyses. We are grateful to Didier Casane and Emmanuelle Renard for fruitful advise and  
363 discussion. We thank Héctor Escrivà for sharing sequence data. This work was funded by the  
364 Conselho Nacional de Desenvolvimento Científico e Tecnológico (CNPq) (process no.  
365 141565/2017-9) to AD and regular funding of the CNRS to JLDL and CG. CG is also supported  
366 by a grant from Agence Nationale de la Recherche (ANR-15-CE32-0011-01 TransVir).

367

368 **References :**

369 Anisimova, M., and O. Gascuel, 2006 Approximate likelihood-ratio test for branches: A fast,  
370 accurate, and powerful alternative. *Systematic Biology* 55: 539-552.

371 Barbeitos, M. S., S. L. Romano and H. R. Lasker, 2010 Repeated loss of coloniality and  
372 symbiosis in scleractinian corals. *Proc Natl Acad Sci U S A* 107: 11877-11882.

373 Boel, E., L. Brady, A. M. Brzozowski, Z. Derewenda, G. G. Dodson *et al.*, 1990 Calcium-  
374 binding in  $\alpha$ -amylases: an X-ray diffraction study at 2.1 Å resolution of two enzymes  
375 from *Aspergillus*. *Biochemistry* 29: 6244-6249.

376 Borner, J., and T. Burmester, 2017 Parasite infection of public databases: a data mining  
377 approach to identify apicomplexan contaminations in animal genome and transcriptome  
378 assemblies. *BMC Genomics* 18: 100.

379 Cordaux, R., and C. Gilbert, 2017 Evolutionary significance of Wolbachia-to-animal horizontal  
380 gene transfer: Female sex determination and the f element in the isopod *Armadillidium*  
381 *vulgare*. *Genes* 8.

382 Da Lage, J.-L., M. Binder, A. Hua-Van, S. Janeček and D. Casane, 2013 Gene make-up: rapid  
383 and massive intron gains after horizontal transfer of a bacterial alpha-amylase gene to  
384 Basidiomycetes. *BMC Evolutionary Biology* 13: 40.

385 Da Lage, J.-L., E. G. J. Danchin and D. Casane, 2007 Where do animal  $\alpha$ -amylases come from?  
386 An interkingdom trip. *FEBS Letters* 581: 3927-3935.

387 Dereeper, A., V. Guignon, G. Blanc, S. Audic, S. Buffet *et al.*, 2008 Phylogeny.fr: robust  
388 phylogenetic analysis for the non-specialist. *Nucleic Acids Research* 36(Web Server  
389 Issue): W465-469.

- 390 Dunning Hotopp, J. C., 2011 Horizontal gene transfer between bacteria and animals. Trends in  
391 Genetics 27.
- 392 Edgar, R. C., 2004 MUSCLE: multiple sequence alignment with high accuracy and high  
393 throughput. Nucleic Acids Research 32: 1792-1797.
- 394 Flores, R. L., and B. T. Livingstone, 2017 The skeletal proteome of the sea star *Patiria miniata*  
395 and evolution of biomineralization in echinoderms. BMC Evolutionary Biology 17: 1-  
396 14.
- 397 Gasmi, L., H. Boulain, A. Hua-Van, K. Musset, A. K. Jakubowska *et al.*, 2015 Recurrent  
398 domestication by Lepidoptera of genes from their parasites mediated by Bracoviruses.  
399 PLoS Genetics 11: e1005470.
- 400 Graham, L. A., J. Li, W. S. Davidson and P. L. Davies, 2012 Smelt was the likely beneficiary  
401 of an antifreeze gene laterally transferred between fishes. BMC Evolutionary Biology  
402 12.
- 403 Grossman, G. L., and A. A. James, 1993 The salivary glands of the vector mosquito *Aedes*  
404 *aegypti*, express a novel member of the amylase gene family. Insect Molecular Biology  
405 1: 223-232.
- 406 Guindon, S., and O. Gascuel, 2003 A simple, fast, and accurate algorithm to estimate large  
407 phylogenies by maximum likelihood. . Systematic Biology 52: 696-704.
- 408 Haegeman, A., J. T. Jones and E. G. Danchin, 2011 Horizontal gene transfer in nematodes: a  
409 catalyst for plant parasitism? Molecular Plant and Microbe Interactions 24: 879-887.
- 410 Hejnal, A., and M. Q. Martindale, 2008 Acoel development indicates the independent evolution  
411 of the bilaterian mouth and anus. Nature 456: 382-386.
- 412 Henrissat, B., and G. Davies, 1997 Structural and sequence-based classification of glycoside  
413 hydrolases. Current Opinion in Structural Biology 7: 637-644.
- 414 Husnik, P., and J. P. McCutcheon, 2018 Functional horizontal gene transfer from bacteria to  
415 eukaryotes. Nature reviews Microbiology 16: 67-79.
- 416 Ip, J. C. H., H. Mu, Q. Chen, J. Sun, S. Ituarte *et al.*, 2018 AmpuBase: a transcriptome database  
417 for eight species of apple snails (Gastropoda: Ampullariidae). BMC Genomics 19: 179.
- 418 Kocot, K. M., 2015 On 20 years of Lophotrochozoa. Organisms Diversity and Evolution 16:  
419 329-343.
- 420 Kocot, K. M., T. H. Struck, J. Merkel, D. S. Waits, C. Todt *et al.*, 2017 Phylogenomics of  
421 Lophotrochozoa with considerations of systematic error. Systematic Biology 66: 256-  
422 282.

- 423 Kumar, S., G. Stecher, M. Suleski and S. B. Hedges, 2017 TimeTree: a resource for timelines,  
424 timetrees, and divergence times. *Molecular Biology and Evolution* 34: 1812-1819.
- 425 Kumar, S., G. Stecher and K. Tamura, 2016 MEGA7: Molecular Evolutionary Genetics  
426 Analysis Version 7.0 for bigger datasets. *Molecular Biology and Evolution* 33: 1870-  
427 1874.
- 428 Laumer, C. E., H. Gruber-Vodicka, M. G. Hadfield, V. B. Pearse, A. Riesgo *et al.*, 2018  
429 Support for a clade of Placozoa and Cnidaria in genes with minimal compositional bias.  
430 *eLife* 7: e36278.
- 431 Letunic, I., and P. Bork, 2016 Interactive tree of life(iTOL) v3: an online tool for the display  
432 and annotation of phylogenetic and other trees. *Nucleic Acids Research* 44: W242-245.
- 433 Lombard, V., H. HGolaconda Ramulu, E. Drula, P. M. Coutinho and B. Henrissat, 2014 The  
434 carbohydrate-active enzymes database (CAZy) in 2013. *Nucleic Acids Research* 42:  
435 490-495.
- 436 Luo, Y.-J., M. Kanda, R. Koyanagi, K. Hisata, T. Akiyama *et al.*, 2018 Nemertean and  
437 phoronid genomes reveal lophotrochozoan evolution and the origin of bilaterian heads.  
438 *Nature Ecology and Evolution* 2: 141-151.
- 439 Luo, Y.-J., T. Takeuchi, R. Koyanagi, L. Yamada, M. Kanda *et al.*, 2015 The *Lingula* genome  
440 provides insights into brachiopod evolution and the origin of phosphate  
441 biomineralization. *Nature communications* 6: 8301.
- 442 MacGregor, E. A., S. Janecek and B. Svensson, 2001 Relationship of sequence and structure  
443 to specificity in the  $\alpha$ -amylase family of enzymes. *Biochimica et Biophysica Acta* 1546:  
444 1-20.
- 445 Marin, F., G. Luquet, B. Marie and D. Medakovic, 2007 Molluscan shell proteins: primary  
446 structure, origin, and evolution. *Current Topics in Developmental Biology* 80: 209-276.
- 447 Marlétaz, F., K. T. C. A. Peljnenburg, T. Goto, N. Satoh and D. S. Rokhsar, 2019 A New  
448 spiralian phylogeny places the enigmatic arrow worms among Gnathiferans. *Current*  
449 *Biology* 29: 312-318.
- 450 Philippe, H., R. Derelle, P. Lopez, K. Pick, C. Borchiellini *et al.*, 2009 Phylogenomics revives  
451 traditional views on deep animal relationships. *Current Biology* 19: 706-712.
- 452 Pisani, D., W. Pett, M. Dohrmann, R. Feuda, O. Rota-Stabelli *et al.*, 2015 Genomic data do not  
453 support comb jellies as the sister group to all other animals. *Proc Natl Acad Sci U S A*  
454 112: 15402-15407.

- 455 Plazzi, F., A. Ceregato, M. Taviani and M. Passamonti, 2011 A molecular phylogeny of bivalve  
456 mollusks: Ancient radiations and divergences as revealed by mitochondrial genes. PLoS  
457 One.
- 458 Pujadas, G., and J. Palau, 2001 Evolution of  $\alpha$ -amylase: architectural features and key residues  
459 in the stabilization of the (b/a)<sub>8</sub> scaffold. Molecular Biology and Evolution 18: 38-54.
- 460 Ramos-Silva, P., J. Kaandorp, L. Huisman, B. Marie, I. Zanella-Cléon *et al.*, 2013 The skeletal  
461 proteome of the coral *Acropora millepora*: the evolution of calcification by co-option  
462 and domain shuffling. Molecular Biology and Evolution 30: 2099-2112.
- 463 Rodríguez, E., M. S. Barbeitos, M. R. Brugler, L. M. Crowley, A. Grajales *et al.*, 2014 Hidden  
464 among Sea Anemones: The First Comprehensive Phylogenetic Reconstruction of the  
465 Order Actiniaria (Cnidaria, Anthozoa, Hexacorallia) Reveals a Novel Group of  
466 Hexacorals. PLoS One 9: e96998.
- 467 Simion, P., H. Philippe, D. Baurain, M. Jager, D. J. Richter *et al.*, 2017 A large and consistent  
468 phylogeny dataset supports sponges as the sister group to all other animals. Current  
469 Biology 27: 958-967.
- 470 Srivastava, M., E. Begovic, J. Chapman, N. H. Putnam, U. Hellsten *et al.*, 2008 The *Trichoplax*  
471 genome and the nature of placozoans. Nature 454: 955-960.
- 472 Srivastava, M., O. Simakov, J. Chapman, B. Fahey, M. E. A. Gauthier *et al.*, 2010 The  
473 *Amphimedon queenslandica* genome and the evolution of animal complexity. Nature  
474 466: 720-726.
- 475 Stam, M. R., E. G. J. Danchin, C. Rancurel, P. M. Coutinho and B. Henrissat, 2006 Dividing  
476 the large glycoside hydrolase family 13 into subfamilies: towards improved functional  
477 annotations of  $\alpha$ -amylase-related proteins. Protein Engineering, Design & Selection 19:  
478 555-562.
- 479 Sullivan, J. C., A. M. Reitzel and J. R. Finnerty, 2006 A high percentage of introns in human  
480 genes were present early in animal evolution: evidence from the basal metazoan  
481 *Nematostella vectensis*. Genome Informatics 17: 219-229.
- 482 Svensson, B., 1994 Protein engineering in the  $\alpha$ -amylase family: catalytic mechanism, substrate  
483 specificity, and stability. Plant Molecular Biology 25: 141-157.
- 484 Tajima, F., 1993 Simple methods for testing the molecular evolutionary clock hypothesis.  
485 Genetics 135: 599-607.
- 486 Uribe, J., Y. Kano, J. Templado and R. Zardoya, 2016 Mitogenomics of Vetigastropoda:  
487 insights into the evolution of pallial symmetry. Zoologica Scripta 45: 145-159.



488 Whelan, N. V., K. M. Kocot, T. P. Moroz, K. Mukherjee, P. Williams *et al.*, 2017 Ctenophore  
489 relationships and their placement as the sister group to all other animals. *Nature*  
490 *Ecology and Evolution* 1: 1737-1746.

491 Whelan, S., and N. Goldman, 2001 A general empirical model of protein evolution derived  
492 from multiple protein families using a maximum-likelihood approach. *Molecular*  
493 *Biology and Evolution* 18: 691-699.

494 Wybouv, N., Y. Pauchet, D. G. Heckel and T. Van Leuwen, 2016 Horizontal gene transfer  
495 contributes to the evolution of arthropod herbivory. *Genome Biology and Evolution* 8:  
496 3594-3613.

497

#### 498 **Legends of figures :**

499

500 **Figure 1:** ML tree of GH13\_1 protein sequences of metazoan and non-metazoan species. The  
501 tree was rooted by placing fungi and unicellular organisms, except choanoflagellates, as  
502 outgroups. The numbers at the nodes are the aLRT supports. Dark green: hemichordates; light  
503 blue: brachiozoans; red: cnidarians, dark blue: sponges; orange: placozoans; pink:  
504 choanoflagellates; purple: amoebozoans; brown: fungi; grey, molluscs; bright green: annelids;  
505 black: other protists.

506

507 **Figure 2:** Intron positions compared across the sampled GH13\_1 genes. The intron positions  
508 found in the studied parts of the sequences were numbered from 1 to 56. Pink: phase zero  
509 introns; green: phase 1 introns; blue: phase 2 introns. The black horizontal bar separates  
510 bilaterians from species where GH13\_1 alpha-amylases are considered native. The color code for  
511 species is the same as in Figure 1.

512

513 **Figure 3:** Two scenarii of HGT/gene losses of the GH13\_1 genes. HGT or gene loss events were  
514 plotted on one of the proposed phylogenies of Bilateria, adapted from references (PLAZZI *et al.*  
515 2011; KOCOT 2015; LUO *et al.* 2015; URIBE *et al.* 2016; KOCOT *et al.* 2017; LUO *et al.* 2018). A:  
516 HGT hypothesis. Black lozanges represent the HGT events, crosses indicate subsequent GH13\_1  
517 loss events. B: Gene loss hypothesis. Crosses indicate GH13\_1 loss events. Taxa for which all  
518 available genomes were found to contain one or more GH13\_1 sequences are in red; taxa in

519 which GH13\_1 sequences were not found are in black; taxa for which only a fraction of  
520 available genomes were found to contain a GH13\_1 sequence are in orange. Divergence times  
521 are from (KUMAR *et al.* 2017).

522

523

#### 524 **Legends of Supplementary figures**

525

526

527 **Figure S1** : General protein alignment of the GH13\_1 sequences used for the gene tree.  
528 Background colors indicate the conservation level of amino acids : red : 100% identity; orange :  
529 80 to 100% identity ; yellow : 60 to 80% identity ; white : below 60% identity.

530

531

532

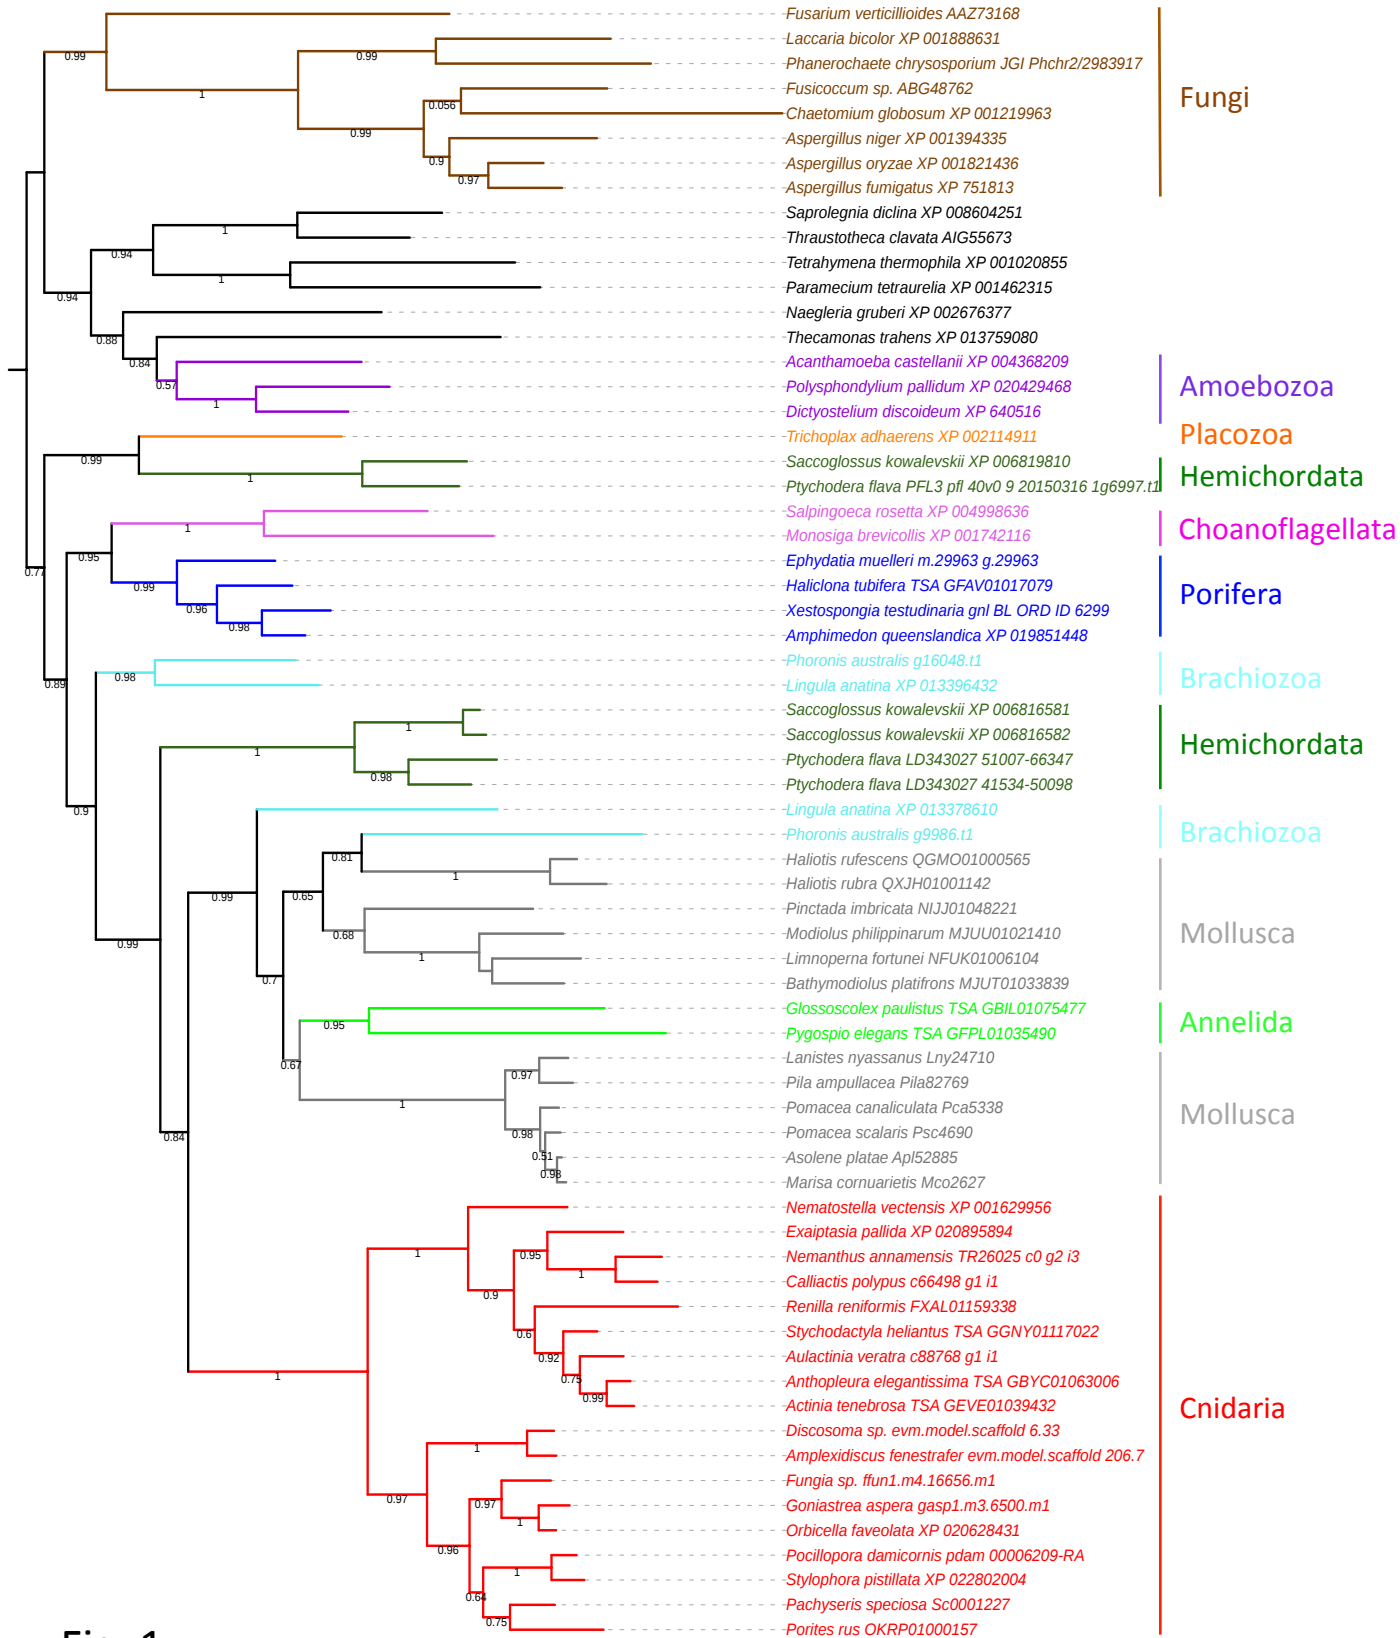

Fig. 1



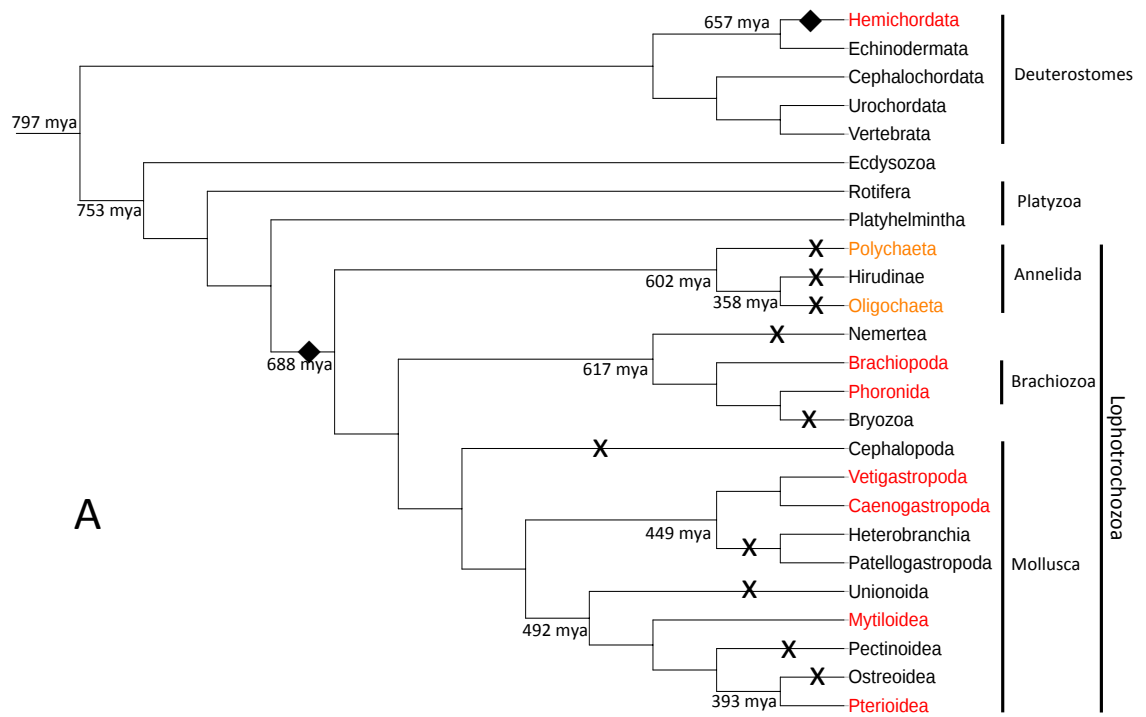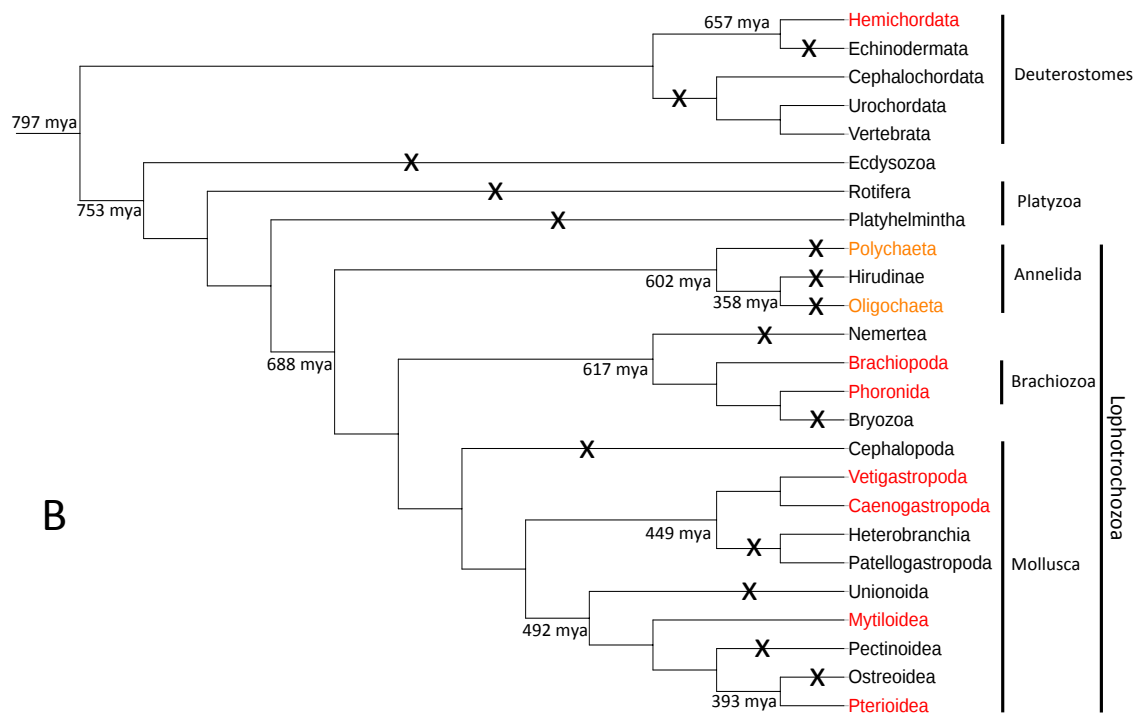

Fig. 3

**Table 1:** GH13\_1-like sequences found after BLAST searches in online databases (not comprehensive for unicellars, without the Fungi). \* : sequences which have not been characterized as protein-coding, in sequenced genomes with long contigs ; (1) : from short DNA sequences (except Sequence reads archive) ; \*\* : reported as GH13\_1 in CAZy.

| Phylum                                   | Species                              | Database         | Accession                |
|------------------------------------------|--------------------------------------|------------------|--------------------------|
| <b><i>NON BILATERIAN METAZOA</i></b>     |                                      |                  |                          |
| Porifera Demospongiae Heteroscleromorpha | <i>Amphimedon queenslandica</i>      | GenBank proteins | XP_019851448             |
| Porifera Demospongiae Heteroscleromorpha | <i>Ephydatia muelleri</i> (1)        | Compagen.org     | m.29963 g.29963          |
| Porifera Demospongiae Heteroscleromorpha | <i>Haliclona tubifera</i>            | GenBank TSA      | GFAV01017079             |
| Porifera Demospongiae Heteroscleromorpha | <i>Spongilla lacustris</i>           | GenBank SRA      | SRX470277                |
| Porifera Demospongiae Heteroscleromorpha | <i>Xestospongia testudinaria</i> (1) | Reefgenomics.org | gnl BL_ORD_ID 6299       |
| Cnidaria Hexacorallia Actiniaria         | <i>Actinia tenebrosa</i>             | GenBank TSA      | GEVE01039432             |
| Cnidaria Hexacorallia Actiniaria         | <i>Anthopleura elegantissima</i>     | GenBank TSA      | GBYC01063006             |
| Cnidaria Hexacorallia Actiniaria         | <i>Anthopleura buddemeieri</i> (1)   | Reefgenomics.org | c117986_g2_i1            |
| Cnidaria Hexacorallia Actiniaria         | <i>Aulactinia veratra</i> (1)        | Reefgenomics.org | c88768_g1_i1             |
| Cnidaria Hexacorallia Actiniaria         | <i>Calliactis polypus</i> (1)        | Reefgenomics.org | c66498_g1_i1             |
| Cnidaria Hexacorallia Actiniaria         | <i>Exaiptasia pallida</i>            | GenBank proteins | XP_020895894             |
| Cnidaria Hexacorallia Actiniaria         | <i>Nematostella vectensis</i>        | GenBank proteins | XP_001629956             |
| Cnidaria Hexacorallia Actiniaria         | <i>Stychodactyla heliantus</i>       | GenBank TSA      | GGNY01117022             |
| Cnidaria Hexacorallia Corallimorpharia   | <i>Amplexidiscus fenestrafer</i> *   | Reefgenomics.org | evm.model.scaffold_206.7 |
| Cnidaria Hexacorallia Corallimorpharia   | <i>Discosoma sp.</i> *               | Reefgenomics.org | evm.model.scaffold_6.33  |
| Cnidaria Hexacorallia Scleratinia        | <i>Acropora digitifera</i>           | GenBank proteins | XP_015760547 partial     |
| Cnidaria Hexacorallia Scleratinia        | <i>Acropora tenuis</i> *             | Reefgenomics.org | aten_0.1.m1.10359.m1     |
| Cnidaria Hexacorallia Scleratinia        | <i>Fungia sp.</i> *                  | Reefgenomics.org | ffun1.m4.16656.m1        |
| Cnidaria Hexacorallia Scleratinia        | <i>Goniastrea aspera</i> *           | Reefgenomics.org | gasp1.m3.6500.m1         |
| Cnidaria Hexacorallia Scleratinia        | <i>Nemanthus annamensis</i> (1)      | Reefgenomics.org | TR26025 c0_g2_i3         |
| Cnidaria Hexacorallia Scleratinia        | <i>Orbicella faveolata</i>           | GenBank proteins | XP_020628431             |
| Cnidaria Hexacorallia Scleratinia        | <i>Pachyseris speciosa</i> *         | Reefgenomics.org | Sc0001227 74283-80000    |
| Cnidaria Hexacorallia Scleratinia        | <i>Pocillopora damicornis</i> *      | Reefgenomics.org | pdam_00006209-RA         |
| Cnidaria Hexacorallia Scleratinia        | <i>Porites lutea</i> *               | Reefgenomics.org | plut2.m8.18618.m1        |
| Cnidaria Hexacorallia Scleratinia        | <i>Porites rus</i>                   | GenBank genomes  | OKRP01000157             |

|                                        |                                   |                  |                               |
|----------------------------------------|-----------------------------------|------------------|-------------------------------|
| Cnidaria Hexacorallia Scleratinia      | <i>Stylophora pistillata</i>      | GenBank proteins | XP_022802004                  |
| Cnidaria Octocorallia Pennatulacea     | <i>Renilla reniformis</i> *       | GenBank genomes  | FXAL01159338                  |
| Placozoa                               | <i>Trichoplax adhaerens</i>       | GenBank proteins | XP_002114911                  |
| <b><i>BILATERIA</i></b>                |                                   |                  |                               |
| Brachiopoda Linguliformea              | <i>Glottidia pyramidata</i>       | GenBank SRA      | SRX731468 (transcriptome)     |
| Brachiopoda Linguliformea              | <i>Lingula anatina</i>            | GenBank proteins | XP_013396432                  |
| Brachiopoda Linguliformea              | <i>Lingula anatina</i>            | GenBank proteins | XP_013378610                  |
| Brachiopoda Phoroniformea or Phoronida | <i>Phoronis australis</i>         | marinegenomics   | g9986.t1                      |
| Brachiopoda Phoroniformea or Phoronida | <i>Phoronis australis</i>         | marinegenomics   | g16048.t1                     |
| Brachiopoda Phoroniformea or Phoronida | <i>Phoronopsis harmeri</i>        | GenBank SRA      | SRX1121914 (transcriptome)    |
| Brachiopoda Craniiformea               | <i>Novocrania anomala</i>         | GenBank SRA      | SRX731472 (transcriptome)     |
| Brachiopoda Rhynchonelliformea         | <i>Kraussina rubra</i>            | GenBank SRA      | SRX112037 (transcriptome)     |
| Brachiopoda Rhynchonelliformea         | <i>Macandrevia cranium</i>        | GenBank SRA      | SRX731471 (transcriptome)     |
| Brachiopoda Rhynchonelliformea         | <i>Terebratalia transversa</i>    | GenBank SRA      | SRX1307070 (transcriptome)    |
| Hemichordata Enteropneusta             | <i>Ptychodera flava</i>           | Marinegenomics   | pfl_40v0_9_20150316_1g2314.t1 |
|                                        |                                   | GenBank WGS      | LD343027_41534-50098          |
| Hemichordata Enteropneusta             | <i>Ptychodera flava</i>           | GenBank WGS      | LD343027_51007-66347          |
| Hemichordata Enteropneusta             | <i>Ptychodera flava</i>           | Marinegenomics   | pfl_40v0_9_20150316_1g6997.t1 |
|                                        |                                   | GenBank WGS      | BCFJ01022326_32811-41459      |
| Hemichordata Enteropneusta             | <i>Saccoglossus kowalevskii</i>   | GenBank proteins | XP_006816582                  |
| Hemichordata Enteropneusta             | <i>Saccoglossus kowalevskii</i>   | GenBank proteins | XP_006816581                  |
| Hemichordata Enteropneusta             | <i>Saccoglossus kowalevskii</i>   | GenBank proteins | XP_006819810                  |
| Hemichordata Enteropneusta             | <i>Schizocardium californicum</i> | GenBank SRA      | SRX1436000                    |
| Mollusca Gastropoda Caenogastropoda    | <i>Asolene plataea</i>            | AmpuBase         | Apl52885                      |
| Mollusca Gastropoda Caenogastropoda    | <i>Conus tribblei (1)</i>         | GenBank WGS      | LFLW010536118                 |
| Mollusca Gastropoda Vetigastropoda     | <i>Haliotis laevigata</i>         | GenBank TSA      | GFTT01038064                  |
| Mollusca Gastropoda Vetigastropoda     | <i>Haliotis rubra</i> *           | GenBank WGS      | QXJH01001142                  |
| Mollusca Gastropoda Vetigastropoda     | <i>Haliotis rufescens</i> *       | GenBank WGS      | QGMO01000565                  |
| Mollusca Gastropoda Caenogastropoda    | <i>Crepidula novicella</i>        | GenBank TSA      | GELE01086894                  |
| Mollusca Gastropoda Caenogastropoda    | <i>Lanistes nyassanus</i>         | AmpuBase         | Lny24710                      |
| Mollusca Gastropoda Caenogastropoda    | <i>Marisa cornuarietes</i>        | AmpuBase         | Mco2627                       |

|                                     |                                      |                  |                         |
|-------------------------------------|--------------------------------------|------------------|-------------------------|
| Mollusca Gastropoda Caenogastropoda | <i>Neverita didyma</i>               | GenBank TSA      | GHHQ01002371            |
| Mollusca Gastropoda Caenogastropoda | <i>Pila ampullacea</i>               | AmpuBase         | Pila82769               |
| Mollusca Gastropoda Caenogastropoda | <i>Pomacea diffusa</i>               | AmpuBase         | Pdi16479 (partial)      |
| Mollusca Gastropoda Caenogastropoda | <i>Pomacea maculata</i>              | AmpuBase         | Pma33988 (partial)      |
| Mollusca Gastropoda Caenogastropoda | <i>Pomacea scalaris</i>              | AmpuBase         | Psc4690                 |
| Mollusca Gastropoda Caenogastropoda | <i>Pomacea canaliculata</i>          | GenBank proteins | XP_025109323            |
|                                     |                                      | AmpuBase         | Pca5338                 |
| Mollusca Gastropoda Caenogastropoda | <i>Rapana venosa</i>                 | GenBank TSA      | GDIA01047641            |
| Mollusca Gastropoda Caenogastropoda | <i>Semisulcospira coreana</i>        | GenBank TSA      | GGNX01073707            |
| Mollusca Bivalvia Mytiloidea        | <i>Limnoperna fortunei (1)</i>       | GenBank Assembly | NFUK01006104            |
| Mollusca Bivalvia Mytiloidea        | <i>Bathymodiolus platifrons*</i>     | GenBank Assembly | MJUT01033839            |
| Mollusca Bivalvia Mytiloidea        | <i>Modiolus philippinarum*</i>       | GenBank Assembly | MJUU01021410            |
| Mollusca Bivalvia Mytiloidea        | <i>Mytilus galloprovincialis (1)</i> | GenBank Assembly | APJB011511270           |
| Mollusca Bivalvia Mytiloidea        | <i>Mytilus galloprovincialis</i>     | GenBank TSA      | GHIK01025031            |
| Mollusca Bivalvia Mytiloidea        | <i>Perna canaliculus</i>             | GenBank TSA      | GGLA01150624            |
| Mollusca Bivalvia Mytiloidea        | <i>Septifer virgatus</i>             | GenBank TSA      | GFKS01035611            |
| Mollusca Bivalvia Pterioidea        | <i>Pinctada martensi*</i>            | GenBank Assembly | CM008066                |
| Mollusca Bivalvia Pterioidea        | <i>Pinctada fucata</i>               | Marinegenomics   | pfu_aug1.0_4142.1_01638 |
| Mollusca Bivalvia Pterioidea        | <i>Pteria penguin</i>                | GeneBank TSA     | GEMO01011007            |
| Mollusca Bivalvia Arcoidea          | <i>Scapharca broughtoni</i>          | GenBank TSA      | GEXI01046152            |
| Annelida Oligochaeta                | <i>Glossoscolex paulitsus</i>        | GenBank TSA      | GBIL01075477            |
| Annelida Polychaeta                 | <i>Hydroides elegans*</i>            | GenBank Assembly | LQRL01141559            |
|                                     |                                      |                  | LQRL01153670            |
| Annelida Polychaeta                 | <i>Pygospio elegans</i>              | GenBank TSA      | GFPL01035490            |
| Annelida Polychaeta                 | <i>Spirobranchus lamarcki</i>        | GenBank TSA      | GGGS01192599            |
| <b>UNICELLULAR EUKARYOTES</b>       |                                      |                  |                         |
| Amoebozoa Mycetozoa                 | <i>Cavendaria fasciculata</i>        | GenBank proteins | XP_004351949            |
| Amoebozoa Mycetozoa                 | <i>Dictyostellium discoideum</i>     | GenBank proteins | XP_640516**             |
| Amoebozoa Mycetozoa                 | <i>Polysphondylium pallidum</i>      | GenBank proteins | XP_020429468            |
| Amoebozoa Discosea                  | <i>Acanthamoeba castellanii</i>      | GenBank proteins | XP_004368209            |
| Choanoflagellida Salpingoecidae     | <i>Monosiga brevicollis</i>          | GenBank proteins | XP_001742116            |



|                                 |                                     |                  |                |
|---------------------------------|-------------------------------------|------------------|----------------|
| Choanoflagellida Salpingoecidae | <i>Salpingoeca rosetta</i>          | GenBank proteins | XP_004998636   |
| Ciliata                         | <i>Ichthyophthirius multifiliis</i> | GenBank proteins | XP_004027176   |
| Ciliata                         | <i>Euplotes focardii</i>            | GenBank proteins | AGU13046**     |
| Ciliata                         | <i>Moneuplotes crassus</i>          | GenBank proteins | AGU13047**     |
| Ciliata                         | <i>Paramecium tetraurelia</i>       | GenBank proteins | XP_001462315   |
| Ciliata                         | <i>Stentor coeruleus</i>            | GenBank proteins | OMJ70617       |
| Ciliata                         | <i>Stylonychia lemnae</i>           | GenBank proteins | CDW84776       |
| Ciliata                         | <i>Tetrahymena thermophila</i>      | GenBank proteins | XP_001020855** |
| Heterolobosea                   | <i>Naegleria gruberi</i>            | GenBank proteins | XP_002676377   |
| Apusozoa                        | <i>Thecamonas trahens</i>           | GenBank proteins | XP_013759080   |
| Oomycetes                       | <i>Achlya hypogyna</i>              | GenBank proteins | AIG56379**     |
| Oomycetes                       | <i>Saprolegnia diclina</i>          | GenBank proteins | XP_008604251   |
| Oomycetes                       | <i>Thraustotheca clavata</i>        | GenBank proteins | AIG55673**     |

**Table S1** : Analysis of neighboring genes for *Lingula anatina*, *Pomacea canaliculata* and *Saccoglossus kowalevskii*, according to the genome browsers at GenBank ; and for *Phoronis australis* and *Ptychodera flava* according to the OIST marine genomics genome browser. Best non-self BLASTP hits against the GenBank Protein database were recorded for each of the three neighboring protein-coding genes on each side of the GH13\_1 genes. The BLAST expect values are indicated. The colors indicate putative orthologous genes for duplicated genes. \* : The two genes are in tandem. (1) : The tandem *Amy* genes are the last ones on this contig. (°) : No counterpart in *Phoronis australis* (for *L. anatina*) or in *Ptychodera flava* (for *S. kowalevskii*).

| Species/gene                                                     | -3                                | -2                              | -1                                   | +1                                 | +2                               | +3                                   |
|------------------------------------------------------------------|-----------------------------------|---------------------------------|--------------------------------------|------------------------------------|----------------------------------|--------------------------------------|
| <i>Lingula anatina</i><br>XP_013396432                           | XP_013396431<br>No animal hit (°) | XP_023931706<br>Vertebrata e-57 | XP_013396389<br>Bivalvia e-11        | XP_023931696<br>Echinodermata e-48 | XP_023931697<br>Hemichordata 0.0 | XP_013406295<br>No animal hit        |
| <i>Lingula anatina</i><br>XP_013378610                           | XP_013378627<br>Annelida e-53     | XP_013378628<br>Bivalvia e-118  | XP_013378631<br>Gastropoda e-59      | XP_013378654<br>Annelida e-51      | XP_013378655<br>Cnidaria e-63    | XP_013378611<br>Cephalochordata e-33 |
| <i>Saccoglossus kowalevskii</i><br>XP_006816581<br>XP_006816582* | XP_006816579<br>No hit (°)        | XP_006816580<br>Hexapoda e-73   | XP_006816576<br>Cephalochordata e-60 | (1)                                | (1)                              | (1)                                  |
| <i>Saccoglossus kowalevskii</i><br>XP_006819810                  |                                   |                                 | XP_006819811<br>No hit (°)           | XP_006819812<br>Placozoa e-47      |                                  |                                      |
| <i>Phoronis australis</i><br>g16048.t1                           |                                   |                                 | g16047.t1<br>Annelida e-71           | g16049.t1<br>No hit                | g16050.t1<br>Bivalvia 0.0        | g16051.t1<br>Brachiopoda e-36        |
| <i>Phoronis australis</i><br>G9986.t1                            | g9983.t1<br>Brachiopoda e-62      | g9984.t1<br>Bivalvia 0.0        | g9985.t1<br>Brachiopoda e-95         | g9987.t1<br>Gastropoda e-77        | g9988.t1<br>Echinodermata e-76   | g9989.t1<br>Brachiopoda 0.0          |
| <i>Ptychodera flava</i><br>LD343027 41534-66347*                 |                                   | 1g2312.t1<br>No hit             | 1g2313.t1<br>Hemichordata e-60       | (1)                                | (1)                              | (1)                                  |
| <i>Ptychodera flava</i><br>1g6997                                | 1g6994<br>No hit                  | 1g6995<br>Hemichordata 0.0      | 1g6996<br>Hemichordata e-79          | 1g6998<br>No hit                   | 1g6999<br>Hemichordata e-79      | 1g7000<br>Echinodermata e-62         |

|                                 |                               |                               |                               |                               |                                |                                |
|---------------------------------|-------------------------------|-------------------------------|-------------------------------|-------------------------------|--------------------------------|--------------------------------|
| <i>Pomacea<br/>canaliculata</i> | XP_025110260<br>Mollusca e-33 | XP_025109347<br>Annelida e-64 | XP_025111249<br>Mollusca e-91 | XP_025109322<br>Mollusca e-80 | XP_025110021<br>Mollusca e-145 | XP_025110160<br>Mollusca e-103 |
|---------------------------------|-------------------------------|-------------------------------|-------------------------------|-------------------------------|--------------------------------|--------------------------------|

Table S2 : Results of Tajima's relative rate tests for the comparison of evolutionary speed of *S. kowalevskii* XP\_006819810 and its paralog XP\_006816581.

| outgroup                | $\chi^2$ | p     |
|-------------------------|----------|-------|
| <i>A. queenslandica</i> | 5.28     | 0.022 |
| <i>E. muelleri</i>      | 0.07     | 0.793 |
| <i>X. testudinaria</i>  | 8.53     | 0.003 |
| <i>M. brevicollis</i>   | 1.61     | 0.204 |
| <i>S. rosetta</i>       | 5.43     | 0.020 |

Limnoperla naefi NFKU01006104  
Halictus ruber QJH01001142  
Halictus fulvifrons QGM001000655  
Pinctada imbricata NJ101048221  
Batilymnoides planifrons MJU101038389  
M. dolius phillipinarum MJU101021410  
Pomacea scarlaris Psc4690  
Pila ampullacea Pfl82769  
Marsis coraearietalis Mco2627  
Laristes nyassanus Lny24710  
Asolene plataea A52885  
Pomacea canaliculata Pca5338  
Glossocercus pallidus TSA GBIL01075477  
Pygospio elegans TSA GFPLO1035490  
Lingula anatina XP\_013395432  
Palaemonetes pugio XP\_013396104  
Pheronix australis g9986.t1  
Pheronix australis gi6048.t1  
Psychoda flava LD343027.41534.50098  
Psychoda flava LD343027.51007.66347  
Psychoda flava PFL3\_ph\_40v\_0\_20150316\_1g6997.t1  
Saccolossus kowalevskii XP\_006816582  
Saccolossus kowalevskii XP\_006816581  
Saccolossus kowalevskii XP\_006819810  
Ephydrata muelleri m\_29963.g.29963  
Amphimicedon queenslandica XP\_013851448  
Xestospongia testudinaria gr1 JB\_L\_ORD\_ID16299  
Haliciona tubifera TSA GFAV01017079  
Tricholax adhaerens XP\_002114911  
Amphirodites fenestrifera evm\_model\_scaffdd\_206.7  
Discomyia sp. evm\_model\_scaffdd\_6.33  
Orbicella favosata XP\_020628431  
Sychocadella helianthus TSA GGNW01117022  
Sylphora pustulata XP\_022802004  
Ecapisia pallida XP\_02089894  
Pocillopora damicornis pdam\_00062609.9A  
Pachyseris spectiosa Sc0001227  
Nemastella vectensis XP\_001629956  
Fungia sp. flung.m.4.16565.m.1  
Goniastrea aspera gaspil.m.3.6500.m.1  
Anthopleura elegantissima TSA GBYC01063006  
Calliastrea polydora c66498.g1\_1  
Nemastoma ananensis TR02051c0\_g2\_13  
Berrilia reniformis FxAL01159338  
Dicyostylum discoidulum XP\_640516  
Polysiphonium pallidum XP\_020429468  
Acartia marooba castellanii XP\_004938209  
Monsigia brevicollis XP\_001742116  
Salpingoeca rosea XP\_00498636  
Paramecium tetraurum XP\_001462215  
Tritalymena thera morphola XP\_001020855  
Thraustotheca clavata A1655673  
Sapr olegia decliva XP\_008924251  
Thecamonas trahere XP\_013795980  
Naegleria gruberi XP\_002676377  
Aspergillus fumigatus XP\_751813  
Aspergillus oryzae XP\_001821436  
Aspergillus niger XP\_001394335  
Fusarium verticillioides AA273168  
Fusicoccum sp. AB548762  
Chaetomium globosum XP\_001219963  
Phanerochaete chrysosporium JGI Phchr22983917  
Laccaria bicolor XP\_001888631

Limnoperla forunei NFJ001006104  
Halictus ruber QJH01001142  
Halictus rufescens QFGK001000655  
Pinctada imbricata N1J01048221  
Batiummodius platifrons MJUT01033839  
M. odolus philippinarum MJLU01021410  
Pomacea scaralis Ps:4690  
Pia amplicollis Pfla82769  
Marsica corruarictis M:62627  
Laristes nyassanus LN:24710  
Asolene platea A:52885  
Pomacea canaliculata Pca5338  
Glossocercus pallidus TSA\_GBL10105477  
Pygospio elegans TSA\_GFLP0135490  
Lingula anatina XP\_01395432  
E. gra anatina XP\_013978610  
Pheronix australis g9986.t1  
Pheronix australis g16048.t1  
Psychoda flava LD343027.51007-66347  
Psychoda flava LD343027.51007-66347  
Psychoda flava PFL\_gal\_40v\_9\_20150316\_16g997.t1  
Saccolossus kowalevskii XP\_006816582  
Saccolossus kowalevskii XP\_006816581  
Saccolossus kowalevskii XP\_006819810  
Ephydrata muelleri m. 29963.g.29963  
Amphimixion queenslandica XP\_019851448  
Xestospongia testudinaria gr1 [JL3D\_ORD\_ID]6299  
Haliciona tubifera TSA\_GFAV01071079  
Trichogloss adhaerens XP\_002114911  
Amphidictyon fenestrifer evm\_model\_scaffdd\_206.7  
Discomyia sp. evm\_model\_scaffdd\_6.33  
Orbicella favosida XP\_020628431  
Sychocodyella hellanica TSA\_GGNW01117022  
Stylophora pustulata XP\_022802004  
Xenopelta pallida XP\_020895894  
Pocillopora damicornis pdam\_00006209-RA  
Pachyseris spectiosa Sc0001227  
Nemastella vectensis XP\_001629956  
Fungia sp. flun1.m.4.16556.m.1  
Goniastrea aspera a.gsp1.m.3.6500.m.1  
Anthopleura elegantissima TSA\_GBYC01063006  
Callipterus polydus c66498.g1\_1  
Nemastoma ananensis TR200251C0\_g2\_13  
Renilla reniformis FSCA01159338  
Dicyostylum discoidalium XP\_640516  
Polysiphonium pallidum XP\_020429468  
Acartia maritima castellanii XP\_004938209  
Monsigia brevicollis XP\_001742116  
Salpingoeca roseata XP\_00498636  
Paramecium tetraura eija XP\_001462215  
Tritalymena thea morphilla XP\_001020855  
The autotheca clavata A:455673  
Sapr. olegia declinata XP\_008924251  
Thecamonas trilinea XP\_013929480  
Naegleria gruberi XP\_002676377  
Aspergillus fumigatus XP\_751813  
Aspergillus oryzae XP\_001821436  
Aspergillus niger XP\_001394335  
Fusarium verticillioides A:4273168  
Fusicoccum sp. A:B:46762  
VSE. AWRV SVNNE WNTM - SKGK - IDG LRVDS AKHETS FWSGSDS  
Chaetomium globosum XP\_001219963  
Phanerochaete clypeosporum [GI] Phchr 22983917  
Laccaria bicolor XP\_001888631
